# Supplementary material
Source: publisher figshare collection journal article supplement (https://plos.figshare.com/articles/dataset/_/6006821)
Supplement: Supplementary file [file 1]

**S3 Table. Air quality in barn 2 equipped with a supply air filter attic.**

| FP | Season | Week | No. of animals | °C indoors<br>± SD | °C outdoors<br>± SD | RH (% ± SD) | Ventilation flow<br>(m <sup>3</sup> /h ± SD) | CO <sub>2</sub> (ppm ± SD) | NH <sub>3</sub> (ppm ± SD) | PM 1 (mg/m <sup>3</sup> ± SD) | PM 2.5 (mg/m <sup>3</sup> ± SD) | PM 4 (mg/m <sup>3</sup> ± SD) |
|----|--------|------|----------------|--------------------|---------------------|-------------|----------------------------------------------|----------------------------|----------------------------|-------------------------------|---------------------------------|-------------------------------|
| 1  | Autumn | 0    | 0              | na                 | na                  | na          | na                                           | na                         | na                         | 0.001 ± 0.002                 | 0.001 ± 0.002                   | 0.001 ± 0.003                 |
|    |        | 2    | 954            | 28.4 ± 0.9         | 25.2 ± 2.5          | na          | 34,978 ± 4,330                               | 1,486 ± 202*               | na                         | 0.014 ± 0.003                 | 0.015 ± 0.003                   | 0.015 ± 0.003                 |
|    |        | 4    | 952            | 27.6 ± 1.5         | 24.5 ± 2.8          | na          | 38,383 ± 1,589                               | 1,707 ± 718*               | na                         | 0.016 ± 0.006                 | 0.017 ± 0.007                   | 0.021 ± 0.008                 |
|    |        | 6    | 945            | 24.0 ± 0.3         | 14.0 ± 1.4          | na          | 18,176 ± 1,251                               | 2,379 ± 100*               | na                         | 0.046 ± 0.016                 | 0.050 ± 0.017                   | 0.060 ± 0.02                  |
|    |        | 8    | 934            | 24.9 ± 0.2         | 14.6 ± 1.2          | na          | 25,214 ± 936                                 | 2,484 ± 145*               | na                         | 0.046 ± 0.018                 | 0.050 ± 0.02                    | 0.057 ± 0.026                 |
|    |        | 10   | 928            | 23.8 ± 0.6         | 13.6 ± 3.2          | na          | 24,397 ± 4,395                               | 2,549 ± 118*               | na                         | 0.077 ± 0.021                 | 0.081 ± 0.024                   | 0.090 ± 0.03                  |
|    |        | 12   | 912            | 23.1 ± 0.5         | 8.3 ± 0.9           | na          | 21,581 ± 3,176                               | 2,902 ± 302*               | 31.62 ± 4.9                | 0.060 ± 0.023                 | 0.064 ± 0.026                   | 0.073 ± 0.032                 |
| 2  | Winter | 0    | 0              | na                 | na                  | na          | na                                           | na                         | na                         | na                            | na                              | na                            |
|    |        | 2    | 960            | 24.4 ± 0.3         | 7.3 ± 0.4           | na          | 15,542 ± 1,854                               | 3,242 ± 296*               | 15.90 ± 1.7                | 0.057 ± 0.001                 | 0.063 ± 0                       | 0.078 ± 0                     |
|    |        | 4    | 954            | 24.3 ± 0.1         | 1.4 ± 1.5           | na          | 15,315 ± 1,529                               | 4,363 ± 315*               | 15.90 ± 2.5                | 0.343 ± 0.37                  | 0.435 ± 0.488                   | 0.543 ± 0.622                 |
|    |        | 6    | na             | na                 | na                  | na          | na                                           | na                         | na                         | na                            | na                              | na                            |
|    |        | 8    | 945            | 23.3 ± 0.4         | 4.2 ± 0.4           | 74 ± 3      | 16,450 ± 1,304                               | 3,523 ± 138*               | 26.55 ± 2.1                | 0.039 ± 0.002                 | 0.043 ± 0.001                   | 0.053 ± 0.003                 |
|    | Spring | 10   | 942            | 23.9 ± 0.2         | 7.4 ± 0.5           | 80 ± 2      | 19,856 ± 945                                 | 3,208 ± 204*               | 23.80 ± 7.1                | 0.089 ± 0.016                 | 0.097 ± 0.018                   | 0.116 ± 0.023                 |
|    |        | 12   | 891            | 23.4 ± 0.4         | 9.0 ± 1.2           | 72 ± 3      | 18,039 ± 1,979                               | 3,010 ± 184*               | 29.95 ± 7.1                | 0.031 ± 0.016                 | 0.036 ± 0.018                   | 0.044 ± 0.023                 |
| 3  | Spring | 0    | 0              | 16.4 ± 1.4         | 4.9 ± 2.2           | 70 ± 1      | na                                           | 2,150 ± 454                | na                         | 0.143 ± 0.003                 | 0.144 ± 0.002                   | 0.144 ± 0.002                 |
|    |        | 2    | 944            | 25.1 ± 0.1         | 8.0 ± 1.0           | 76 ± 3      | 15,996 ± 642                                 | 3,083 ± 336                | 11.50 ± 3.4                | 0.137 ± 0.129                 | 0.175 ± 0.178                   | 0.203 ± 0.206                 |
|    |        | 4    | 942            | 24.4 ± 0.2         | 13.1 ± 0.9          | 71 ± 3      | 18,721 ± 435                                 | 1,749 ± 233                | 16.35 ± 1.3                | 0.038 ± 0.001                 | 0.040 ± 0.001                   | 0.045 ± 0.002                 |
|    |        | 6    | 939            | 24.3 ± 0.4         | 10.8 ± 2.0          | 71 ± 3      | 20,083 ± 1,940                               | 2,364 ± 101                | 24.5 ± 7.2                 | 0.034 ± 0.005                 | 0.038 ± 0.005                   | 0.046 ± 0.005                 |
|    | Summer | 8    | 936            | 24.7 ± 1.0         | 15.2 ± 2.4          | 66 ± 6      | 26,440 ± 3,327                               | 1,990 ± 316                | na                         | 0.030 ± 0.006                 | 0.032 ± 0.007                   | 0.037 ± 0.008                 |
|    |        | 10   | 933            | 22.6 ± 0.2         | 10.0 ± 1.0          | 72 ± 1      | 19,629 ± 642                                 | 2,114 ± 110                | na                         | 0.052 ± 0.027                 | 0.058 ± 0.03                    | 0.071 ± 0.037                 |
|    |        | 12   | 847            | 29.0 ± 0.9         | 25.6 ± 0.6          | 71 ± 1      | 36,431 ± 0                                   | 1,130 ± 209                | na                         | 0.038 ± 0.009                 | 0.040 ± 0.011                   | 0.045 ± 0.014                 |

Measurements were taken at two week intervals and sampling was performed between 9 a.m. and 12 p.m.. Temperatures, relative humidity (RH), ventilation flow, and CO<sub>2</sub> represent the mean of data recorded during sampling time.

Dust values were calculated from data collected by the DustTrak™ DRX Aerosol Monitor over 10 min at two sampling points. NH<sub>3</sub> values are means of two measurements per barn.

Seasons were defined according to the astronomical calendar: spring (21st March to 20th June), summer (21st June to 22nd September), autumn (23rd September to 21st December), winter (22nd December to 20th March).

\*measured with a handheld device (Testo 535); FP - fattening period; na - data not available; SD - standard deviation; PM - particulate matter
