# Supplementary material
Source: publisher figshare collection journal article supplement (https://plos.figshare.com/articles/dataset/_/6006821)
Supplement: Supplementary file [file 1]

**S5 Table. Air quality in barn 3 without air filtration.**

| FP | Season | Week | No. of animals   | °C indoors ± SD   | °C outdoors ± SD | RH (% ± SD)     | Ventilation flow (m <sup>3</sup> /h ± SD) | CO <sub>2</sub> (ppm ± SD) | NH <sub>3</sub> (ppm ± SD) | PM 1 (mg/m <sup>3</sup> ± SD) | PM 2.5 (mg/m <sup>3</sup> ± SD) | PM 4 (mg/m <sup>3</sup> ± SD) |
|----|--------|------|------------------|-------------------|------------------|-----------------|-------------------------------------------|----------------------------|----------------------------|-------------------------------|---------------------------------|-------------------------------|
| 1  | Autumn | 0    | 0                | 23.7 ± 1.2        | 14.3 ± 0.7       | na              | na                                        | na                         | na                         | 0.015 ± 0.01                  | 0.016 ± 0.01                    | 0.016 ± 0.01                  |
|    |        | 2    | 943              | 25.8 ± 0.2        | 15.4 ± 0.2       | na              | 22,145 ± 1,398                            | 2,115 ± 75*                | na                         | 0.106 ± 0.034                 | 0.107 ± 0.035                   | 0.110 ± 0.036                 |
|    |        | 4    | 940              | 24.4 ± 0.1        | 9.2 ± 0.6        | na              | 16,644 ± 889                              | 2,758 ± 281*               | 14.78 ± 0.9                | 0.103 ± 0.008                 | 0.105 ± 0.008                   | 0.110 ± 0.008                 |
|    |        | 6    | 938              | 25.2 <sup>§</sup> | 9.5 <sup>§</sup> | na              | 24,433 <sup>§</sup>                       | 3,590 ± 408*               | 19.95 ± 2.8                | 0.185 ± 0.109                 | 0.193 ± 0.118                   | 0.203 ± 0.121                 |
|    |        | 8    | 931              | 24.3 ± 0.3        | 12.8 ± 0.3       | na              | 25,309 ± 1,838                            | 2,051 ± 185*               | 13.65 ± 0.9                | 0.06 ± 0.014                  | 0.064 ± 0.015                   | 0.073 ± 0.016                 |
|    |        | 10   | 916              | 24.1 ± 0.5        | 8.8 ± 0.6        | na              | 23,119 ± 2,677                            | 2,793 ± 272*               | 21.05 ± 1.5                | 0.079 ± 0.02                  | 0.088 ± 0.023                   | 0.105 ± 0.003                 |
|    |        | 12   | 861              | 23.1 ± 0.3        | 1.4 ± 1.5        | na              | 16,888 ± 1,159                            | 4,024 ± 222*               | 27.90 ± 7.2                | 0.106 ± 0.033                 | 0.117 ± 0.036                   | 0.138 ± 0.044                 |
| 2  | Winter | 0    | 0                | 19.0 ± 2.4        | 4.5 ± 0.3        | na              | na                                        | na                         | na                         | 0.023 ± 0.004                 | 0.024 ± 0.005                   | 0.024 ± 0.005                 |
|    |        | 2    | 941              | 25.1 ± 0.2        | 11.2 ± 1.1       | 67 ± 3          | 17,374 ± 487                              | 1,995 ± 166                | 12.55 ± 0.6                | 0.056 ± 0.005                 | 0.060 ± 0.006                   | 0.071 ± 0.008                 |
|    |        | 4    | 936              | 24.2 ± 0.2        | 5.7 ± 1.0        | 67 ± 3          | 15,573 ± 243                              | 2,679 ± 143                | 14.05 ± 1.8                | 0.060 ± 0.035                 | 0.066 ± 0.038                   | 0.078 ± 0.047                 |
|    |        | 6    | 928              | 24.1 ± 0.2        | 4.3 ± 0.7        | 75 ± 3          | 15,330 ± 466                              | 3,187 ± 196                | 18.1 ± 1.4                 | 0.058 ± 0.009                 | 0.065 ± 0.011                   | 0.08 ± 0.015                  |
|    |        | 8    | 926              | 23.8 <sup>§</sup> | 5.3 <sup>§</sup> | 76 <sup>§</sup> | 15,671 <sup>§</sup>                       | 2,974 <sup>§</sup>         | 24.25 ± 5.3                | 0.075 ± 0                     | 0.078 ± 0.001                   | 0.084 ± 0.001                 |
|    | Spring | 10   | 924              | 23.2 ± 0.1        | 7.2 ± 0.8        | 75 ± 1          | 17,277 ± 613                              | 2,690 ± 158                | 19.40 ± 8.3                | 0.065 ± 0.001                 | 0.071 ± 0.001                   | 0.082 ± 0.002                 |
|    |        | 12   | 894              | 25.0 ± 0.2        | 14.8 ± 2.1       | 69 ± 2          | 27,597 ± 1,225                            | 1,957 ± 176                | 22.80 ± 2.1                | 0.098 ± 0.013                 | 0.104 ± 0.015                   | 0.117 ± 0.018                 |
| 3  | Spring | 0    | 600 <sup>#</sup> | 24.4 ± 0.1        | 9.8 ± 1.1        | na              | na                                        | na                         | na                         | 0.065 ± 0.023                 | 0.076 ± 0.028                   | 0.089 ± 0.035                 |
|    |        | 2    | 953              | 25.9 ± 0.1        | 16.2 ± 2.3       | 73 ± 3          | 15,305 ± 466                              | 2,411 ± 382                | na                         | 0.087 ± 0.042                 | 0.096 ± 0.05                    | 0.101 ± 0.049                 |
|    |        | 4    | 950              | 26.7 ± 0.1        | 18.5 ± 0.2       | 76 ± 1          | 25,285 ± 1,004                            | 1,644 ± 115                | na                         | 0.083 ± 0.007                 | 0.084 ± 0.007                   | 0.086 ± 0.007                 |
|    |        | 6    | 948              | 25.8 ± 0.3        | 17.4 ± 1.1       | 73 ± 1          | 26,624 ± 1,288                            | 1,778 ± 140                | 15.9 ± 5.4                 | 0.031 ± 0.015                 | 0.033 ± 0.017                   | 0.039 ± 0.021                 |
|    | Summer | 8    | 945              | 25.8 ± 0.5        | 19.8 ± 1.6       | 67 ± 4          | 31,492 ± 3,192                            | 1,454 ± 161                | 25.60 ± 5.1                | 0.034 ± 0                     | 0.037 ± 0                       | 0.043 ± 0                     |
|    |        | 10   | 938              | 31.7 ± 0.8        | 29.4 ± 1.5       | 63 ± 3          | 40,985 ± 0                                | 1,164 ± 64                 | 15.90 ± 2.8                | 0.038 ± 0.003                 | 0.039 ± 0.003                   | 0.042 ± 0.004                 |
|    |        | 12   | 932              | 27.2 ± 0.5        | 21.5 ± 0.9       | 75 ± 2          | 39,037 ± 0                                | 1,287 ± 190                | 21.80 ± 0                  | 0.073 ± 0.001                 | 0.074 ± 0                       | 0.077 ± 0.001                 |

Measurements were taken at two week intervals and sampling was performed between 9 a.m. and 12 p.m.. Temperatures, relative humidity (RH), ventilation flow, and CO<sub>2</sub> represent the mean of data recorded during sampling time.

Dust values were calculated from data collected by the DustTrak™ DRX Aerosol Monitor over 10 min at two sampling points. NH<sub>3</sub> values are means of two measurements per barn.

Seasons were defined according to the astronomical calendar: spring (21st March to 20th June), summer (21st June to 22nd September), autumn (23rd September to 21st December), winter (22nd December to 20th March).

<sup>§</sup>data logging over time by the computer system failed and the given value represents a single value taken directly from the control panel in front of the barn

\*measured with a handheld device (Testo 535); FP - fattening period; na - data not available; SD - standard deviation; PM - particulate matter

<sup>#</sup> due to organizational reasons sampling at the abandoned barn was not possible
