# Supplementary material
Source: publisher figshare collection journal article supplement (https://plos.figshare.com/articles/dataset/_/6006821)
Supplement: Supplementary file [file 1]

**S2 Table. Air quality in barn 1 equipped with supply air filter modules.**

| FP | Season | Week | No. of animals | °C indoors ± SD | °C outdoors ± SD | RH (% ± SD) | Ventilation flow (m <sup>3</sup> /h ± SD) | CO <sub>2</sub> (ppm ± SD) | NH <sub>3</sub> (ppm ± SD) | PM 1 (mg/m <sup>3</sup> ± SD) | PM 2.5 (mg/m <sup>3</sup> ± SD) | PM 4 (mg/m <sup>3</sup> ± SD) |
|----|--------|------|----------------|-----------------|------------------|-------------|-------------------------------------------|----------------------------|----------------------------|-------------------------------|---------------------------------|-------------------------------|
| 1  | Autumn | 0    | 0              | 26.1 ± 1.7      | 24.5 ± 2.8       | na          | na                                        | na                         | na                         | 0.001 ± 0.001                 | 0.001 ± 0.001                   | 0.001 ± 0.001                 |
|    |        | 2    | 952            | 24.9 ± 0.2      | 14.0 ± 1.4       | na          | 16,688 ± 745                              | 2,270 ± 147*               | na                         | 0.020 ± 0.007                 | 0.022 ± 0.008                   | 0.027 ± 0.01                  |
|    |        | 4    | 951            | 25.2 ± 0.2      | 14.6 ± 1.2       | na          | 17,682 ± 1,102                            | 2,273 ± 137*               | na                         | 0.045 ± 0.011                 | 0.048 ± 0.011                   | 0.052 ± 0.01                  |
|    |        | 6    | 945            | 24.8 ± 0.7      | 13.6 ± 3.2       | na          | 20,911 ± 3,792                            | 2,724 ± 340*               | na                         | 0.065 ± 0.014                 | 0.070 ± 0.016                   | 0.079 ± 0.019                 |
|    |        | 8    | 941            | 23.5 ± 0.2      | 8.3 ± 0.9        | na          | 16,937 ± 1,102                            | 3,297 ± 541*               | 25.78 ± 4.9                | 0.095 ± 0.079                 | 0.112 ± 0.107                   | 0.123 ± 0.111                 |
|    |        | 10   | 939            | 23.6 ± 0.2      | 8.5 ± 2.1        | na          | 16,937 ± 1,102                            | 3,063 ± 183*               | 18.65 ± 3.2                | 0.092 ± 0.054                 | 0.107 ± 0.070                   | 0.127 ± 0.076                 |
|    |        | 12   | 876            | 24.0 ± 0.5      | 12.8 ± 0.3       | na          | 15,073 ± 9,605                            | 1,931 ± 293*               | 11.60 ± 2.0                | 0.049 ± 0.011                 | 0.054 ± 0.013                   | 0.066 ± 0.015                 |
| 2  | Winter | 0    | 0              | 19.3 ± 8.7      | 7.8 ± 0.9        | na          | na                                        | na                         | na                         | 0.041 ± 0.006                 | 0.041 ± 0.006                   | 0.041 ± 0.007                 |
|    |        | 2    | na             | na              | na               | na          | na                                        | na                         | na                         | na                            | na                              | na                            |
|    |        | 4    | 945            | 23.8 ± 0.1      | 5.3 ± 0.7        | 66 ± 2      | 15,620 ± 754                              | 2,270 ± 153                | 16.95 ± 4.0                | 0.067 ± 0.025                 | 0.075 ± 0.028                   | 0.092 ± 0.035                 |
|    |        | 6    | 944            | 23.9 ± 0.2      | 7.4 ± 0.5        | 69 ± 2      | 18,303 ± 641                              | 2,197 ± 956                | 14.25 ± 1.8                | 0.086 ± 0.016                 | 0.094 ± 0.018                   | 0.111 ± 0.024                 |
|    |        | 8    | 940            | 24.3 ± 0.2      | 9.0 ± 1.2        | 64 ± 3      | 17,309 ± 1,183                            | 2,107 ± 181                | 19.80 ± 2.1                | 0.052 ± 0.009                 | 0.058 ± 0.01                    | 0.071 ± 0.011                 |
|    | Spring | 10   | 938            | 23.9 ± 0.3      | 11.8 ± 0.8       | 66 ± 2      | 18,303 ± 849                              | 1,583 ± 55                 | 16.60 ± 3.4                | 0.081 ± 0.049                 | 0.09 ± 0.055                    | 0.11 ± 0.069                  |
|    |        | 12   | 802            | 22.7 ± 0.1      | 4.9 ± 2.2        | 72 ± 4      | 13,831 ± 625                              | 2,744 ± 447                | 17.75 ± 1.2                | 0.098 ± 0.007                 | 0.107 ± 0.006                   | 0.125 ± 0.004                 |
| 3  | Spring | 0    | 0              | 23.3 ± 0.5      | 13.1 ± 0.9       | na          | na                                        | na                         | 17.4 ± 5.0                 | 0.008 ± 0                     | 0.008 ± 0                       | 0.008 ± 0                     |
|    |        | 2    | 956            | 25.1 ± 0.6      | 10.8 ± 2.0       | 66 ± 5      | 12,838 ± 1,463                            | 2,540 ± 343                | 9.10 ± 1.8                 | 0.075 ± 0.025                 | 0.083 ± 0.028                   | 0.101 ± 0.035                 |
|    |        | 4    | 952            | 25.4 ± 0.6      | 15.2 ± 2.4       | 62 ± 6      | 19,794 ± 1,924                            | 1,850 ± 256                | na                         | 0.049 ± 0.009                 | 0.053 ± 0.01                    | 0.063 ± 0.013                 |
|    |        | 6    | 951            | 23.7 ± 0.3      | 10.0 ± 0.9       | 69 ± 3      | 15,322 ± 811                              | 2,140 ± 166                | na                         | 0.067 ± 0.003                 | 0.074 ± 0.004                   | 0.090 ± 0.004                 |
|    | Summer | 8    | 943            | 28.9 ± 0.4      | 25.6 ± 0.6       | 68 ± 1      | 32,712 ± 248                              | 1,409 ± 99                 | na                         | 0.034 ± 0.006                 | 0.036 ± 0.007                   | 0.040 ± 0.008                 |
|    |        | 10   | 938            | 25.7 ± 0.3      | 18.9 ± 2.1       | 73 ± 2      | 26,750 ± 1,307                            | 1,446 ± 156                | 12.45 ± 0.6                | 0.042 ± 0.012                 | 0.044 ± 0.013                   | 0.049 ± 0.015                 |
|    |        | 12   | 895            | 26.5 ± 0.2      | 22.8 ± 1.6       | 71 ± 2      | 36,190 ± 1,307                            | 1,214 ± 65                 | 26.80 ± 2.1                | 0.035 ± 0.025                 | 0.038 ± 0.027                   | 0.047 ± 0.035                 |

Measurements were taken at two week intervals and sampling was performed between 9 a.m. and 12 p.m.. Temperatures, relative humidity (RH), ventilation flow, and CO<sub>2</sub> represent the mean of data recorded during sampling time.

Dust values were calculated from data collected by the DustTrak™ DRX Aerosol Monitor over 10 min at two sampling points. NH<sub>3</sub> values are means of two measurements per barn.

Seasons were defined according to the astronomical calendar: spring (21st March to 20th June), summer (21st June to 22nd September), autumn (23rd September to 21st December), winter (22nd December to 20th March).

\*measured with a handheld device (Testo 535); FP - fattening period; na - data not available; SD - standard deviation; PM - particulate matter
